# Supplementary material for: Inhibition and degradation of NRAS with a pan-NRAS monobody
Source: PubMed Central journal article supplement (PMC11584388; doi:10.1038/s41388-024-03186-y), 2024-10-08
Supplement: 41388_2024_3186_MOESM1_ESM.pdf [file 41388_2024_3186_MOESM1_ESM.pdf]

## Supplemental Figure 1

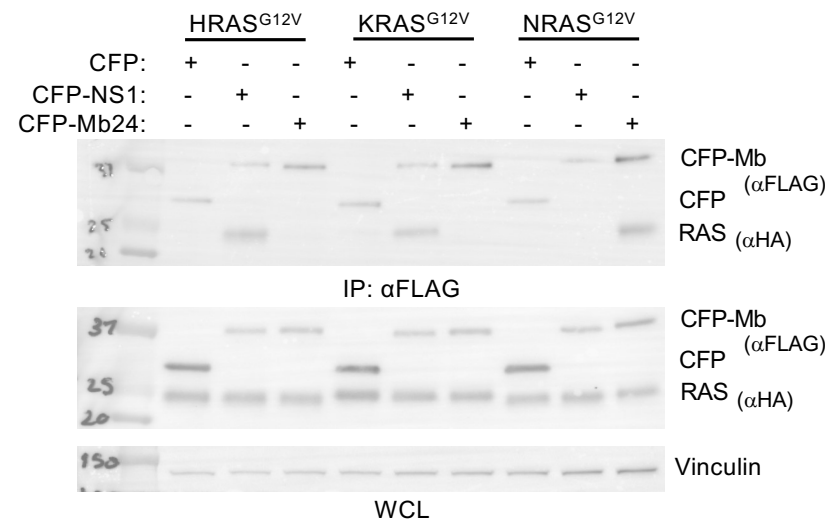

**Supplemental Figure 1.** Raw data (chemiluminescence overlaid on membrane) from Western Blot from Fig. 1B.

## Supplemental Figure 2

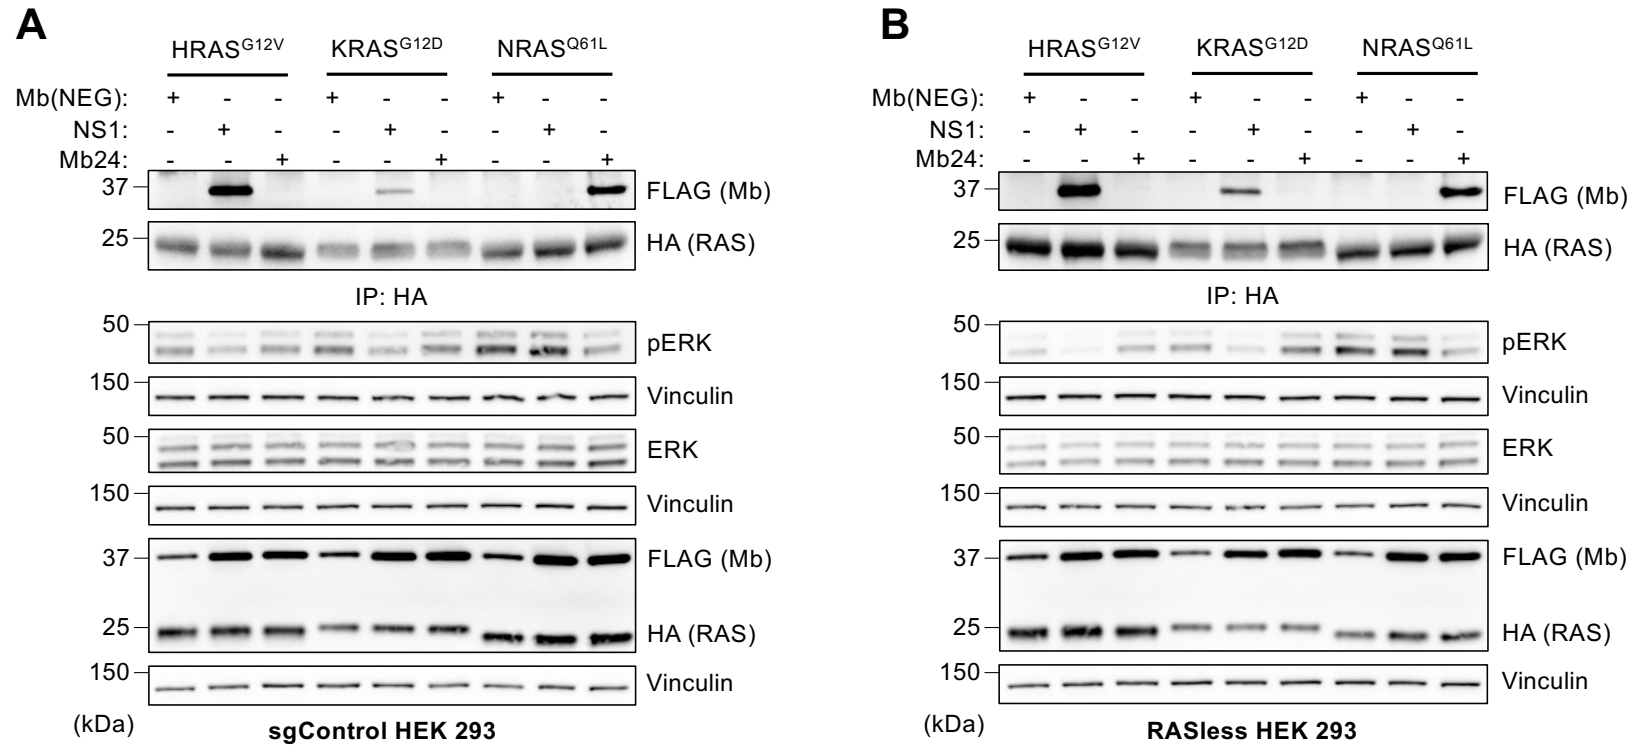

**Supplemental Figure 2.** Representative Western Blots for Figures 2A and 2B. A) Control (sgControl) HEK 293 cells and (B) RASless HEK 293 cells cotransfected with CFP-FLAG-tagged Mb(-), NS1, or Mb24 and HA-tagged HRAS<sup>G12V</sup>, KRAS<sup>G12D</sup>, NRAS<sup>Q61L</sup>. Western Blots were performed for WCL and immunoprecipitated HA to determine interaction of HA-tagged RAS with indicated FLAG-tagged Mbs.

### Supplemental Figure 3

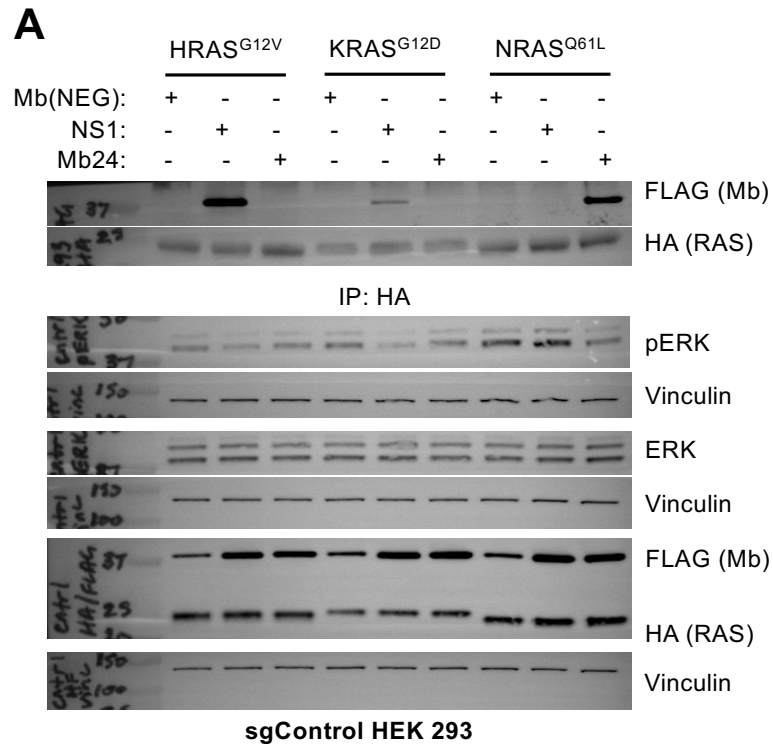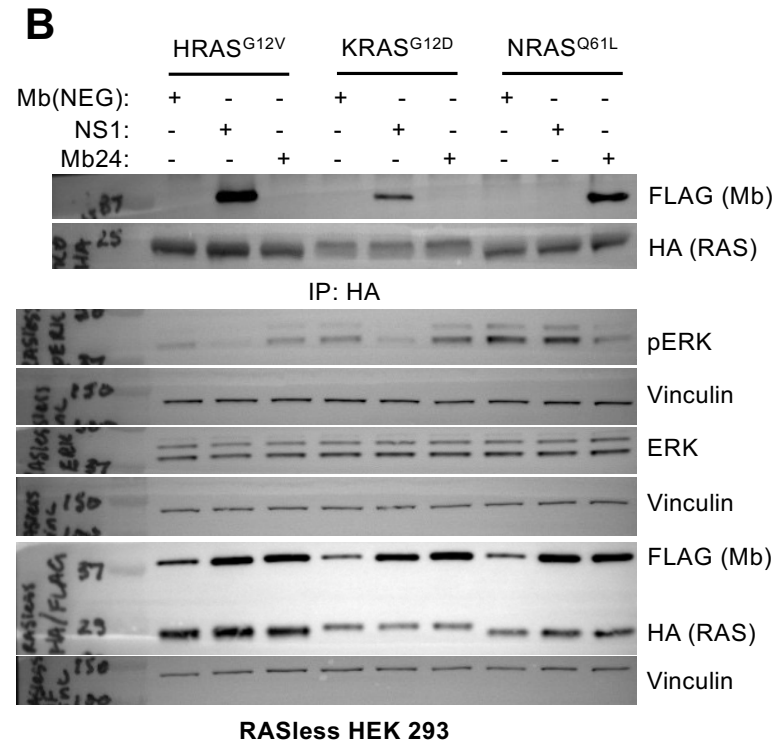

Supplemental Figure 3. Raw data for Sup. Fig. 2.

## Supplemental Figure 4

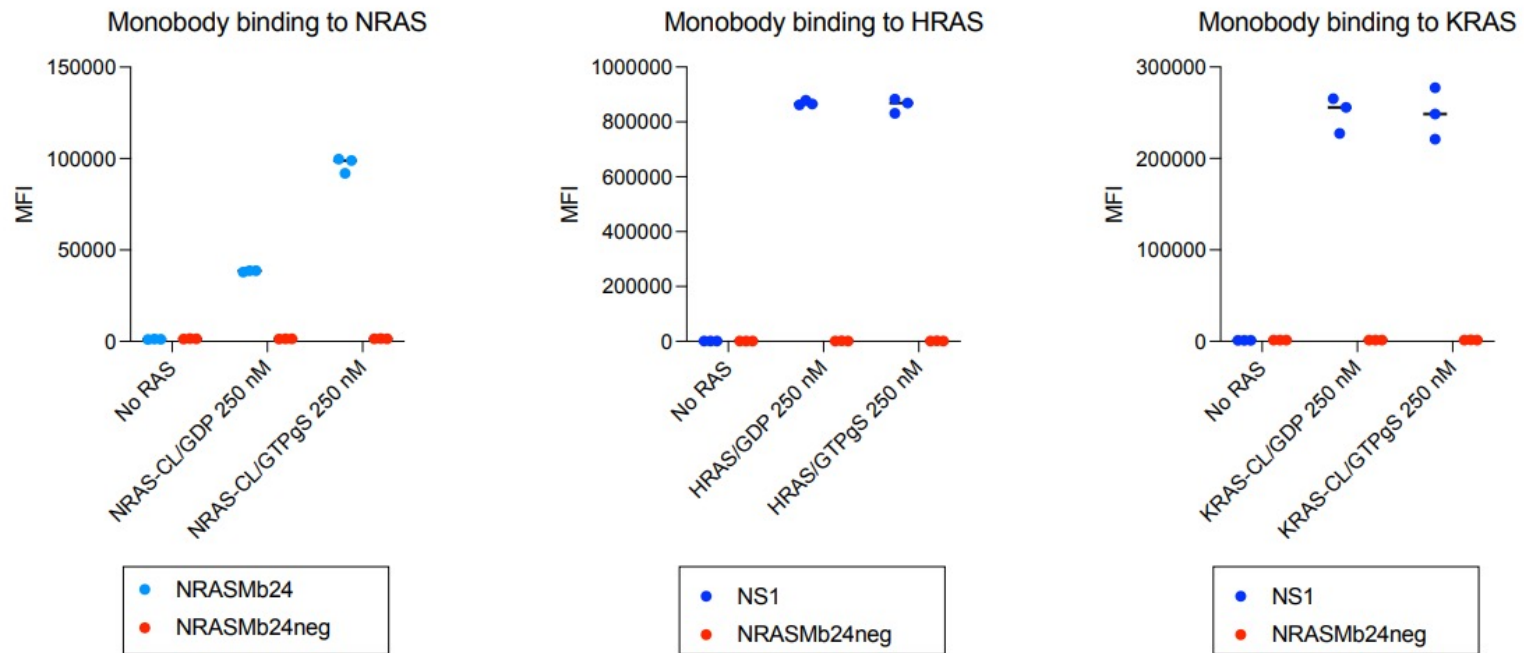

**Supplemental Figure 4.** Validation of negative control Mb (Mb(-)) that is null for interacting with all RAS isoforms. Results shown are from yeast surface display followed by flow cytometry to determine binding displayed in mean fluorescence units.

## Supplemental Figure 5

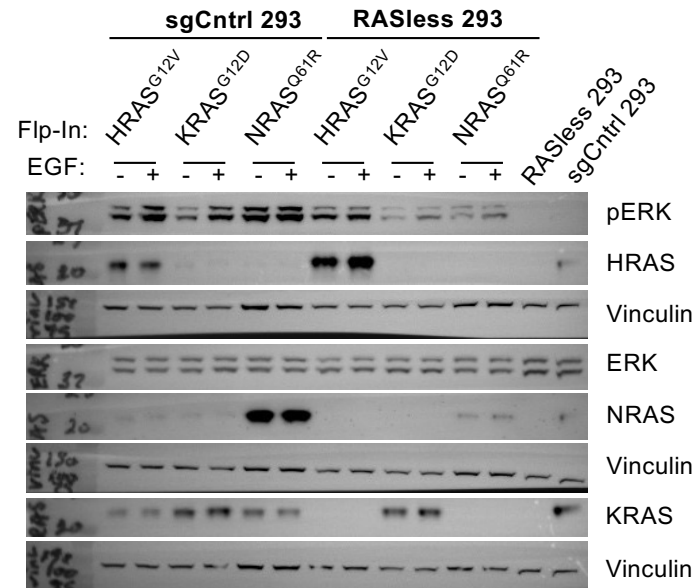

Supplemental Figure 5. Raw data for Figure 2D.

## Supplemental Figure 6

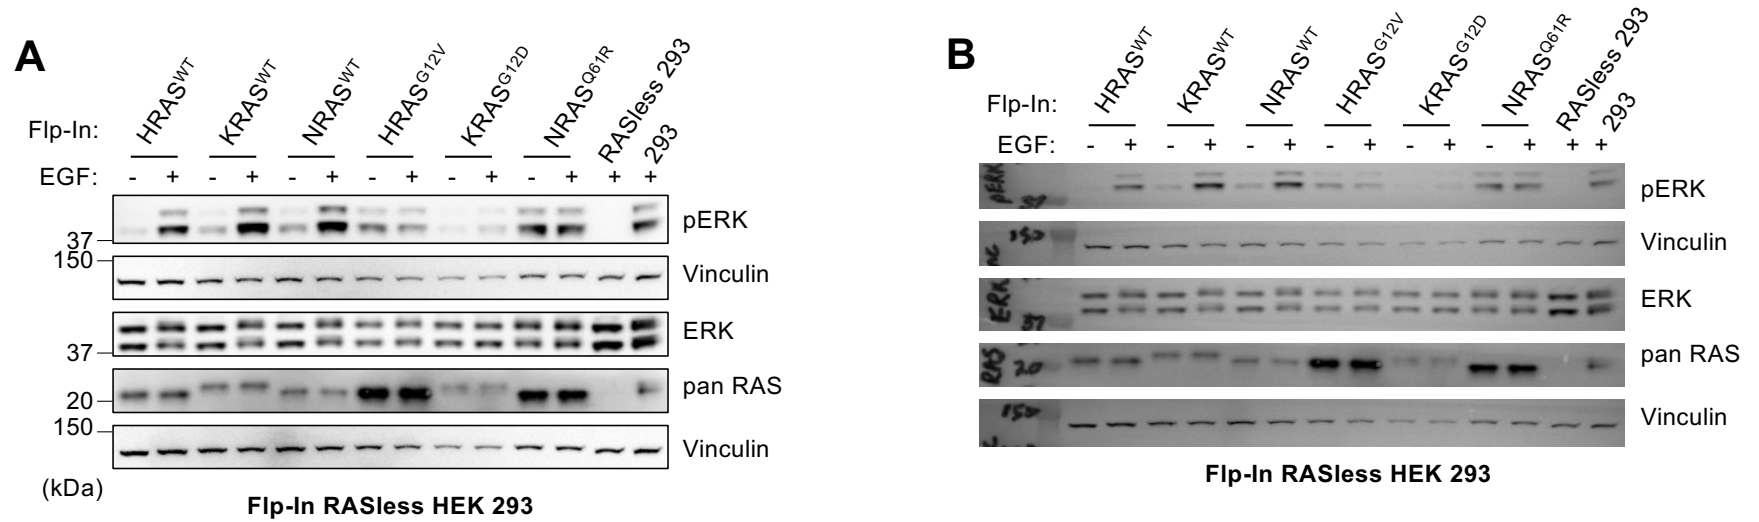

**Supplemental Figure 6.** A) Western Blot of the indicated RASless HEK 293 (Flp-In RAS) cells +/- 20 ng/mL EGF for 5 min. B) Raw data for Sup. Fig. 6A.

## Supplemental Figure 7

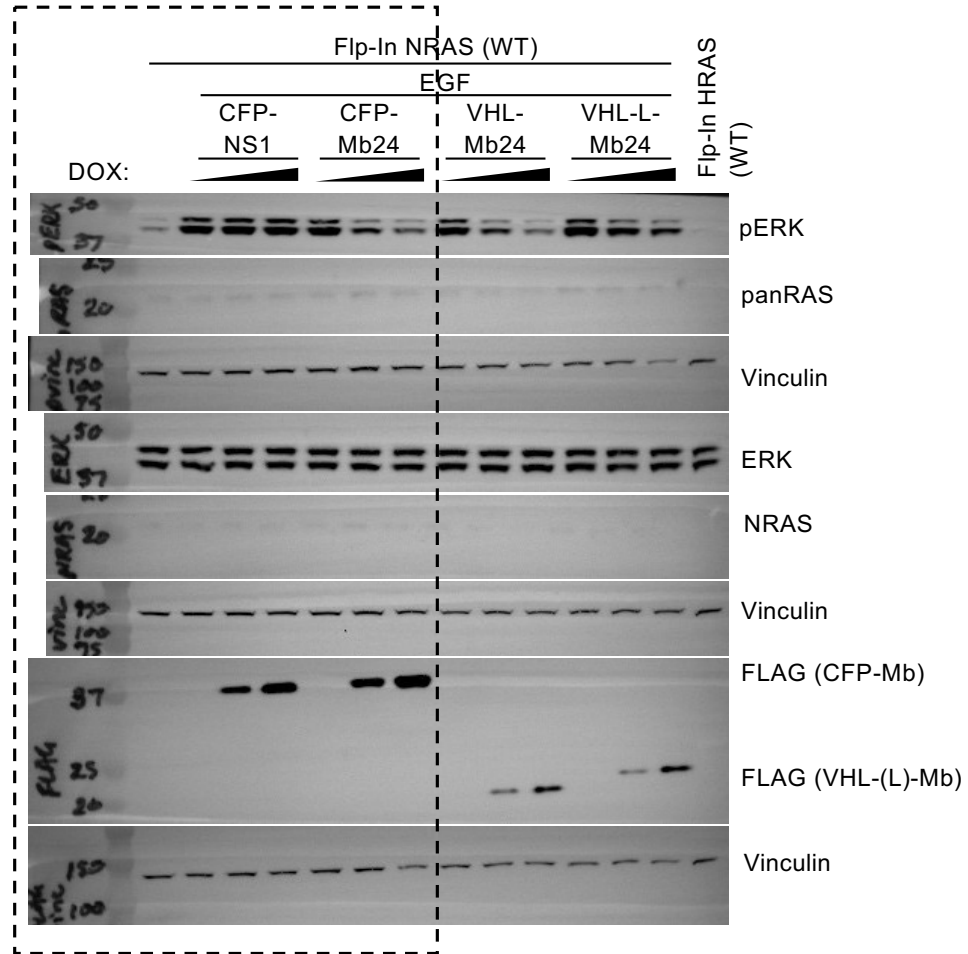

**Supplemental Figure 7.** Raw data for Fig. 2E and Sup. Fig. 12. Data within the dotted box represents raw data for Fig. 2E while the whole blot represents raw data for Sup. Fig.12.

## Supplemental Figure 8

**A**

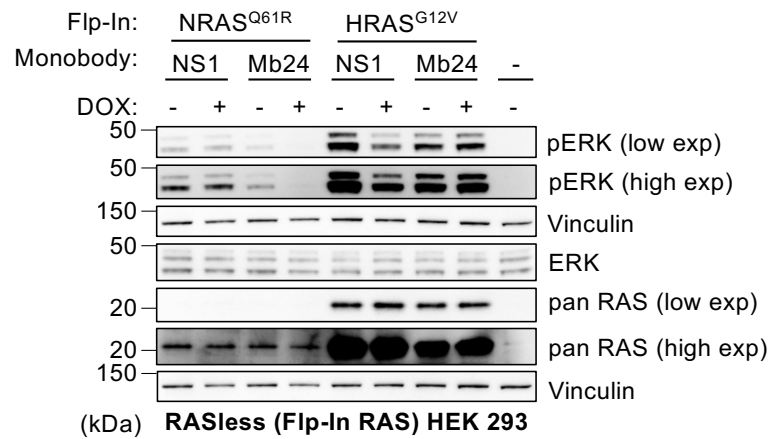

**B**

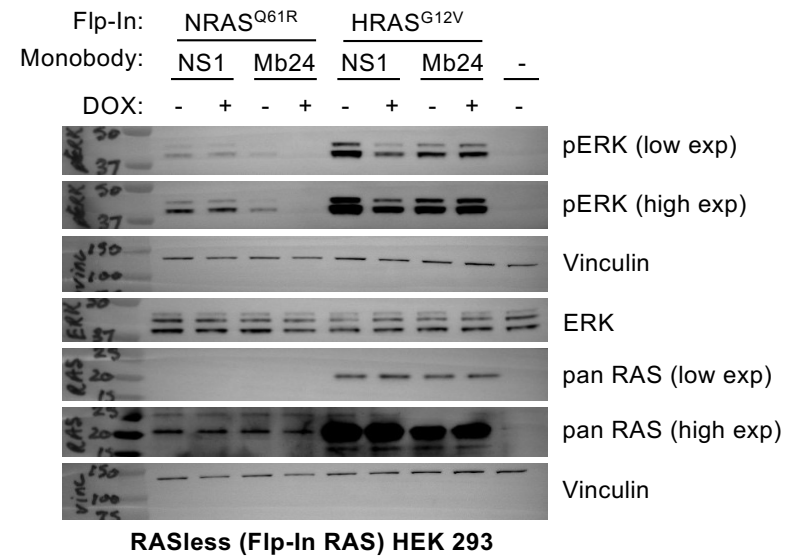

**Supplemental Figure 8.** A) Western Blot of the indicated RASless HEK 293 (Flp-In RAS) +/- DOX (2 ug/mL) with stable, DOX-inducible CFP-FLAG-tagged NS1 or Mb24. B) Raw data for Sup. Fig. 8A.



## Supplemental Figure 9

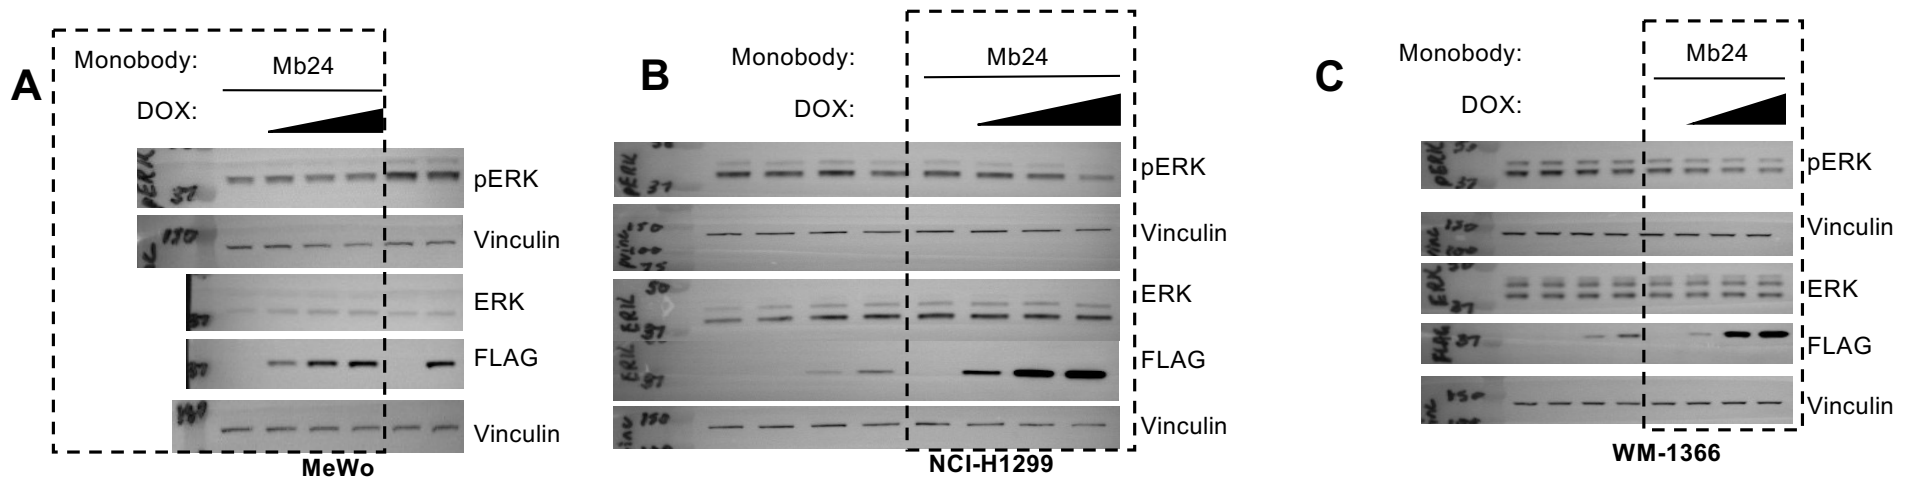

Supplemental Figure 9. Raw data (within the dotted boxes) for Western Blots from Figures 2A–2C.

## Supplemental Figure 10

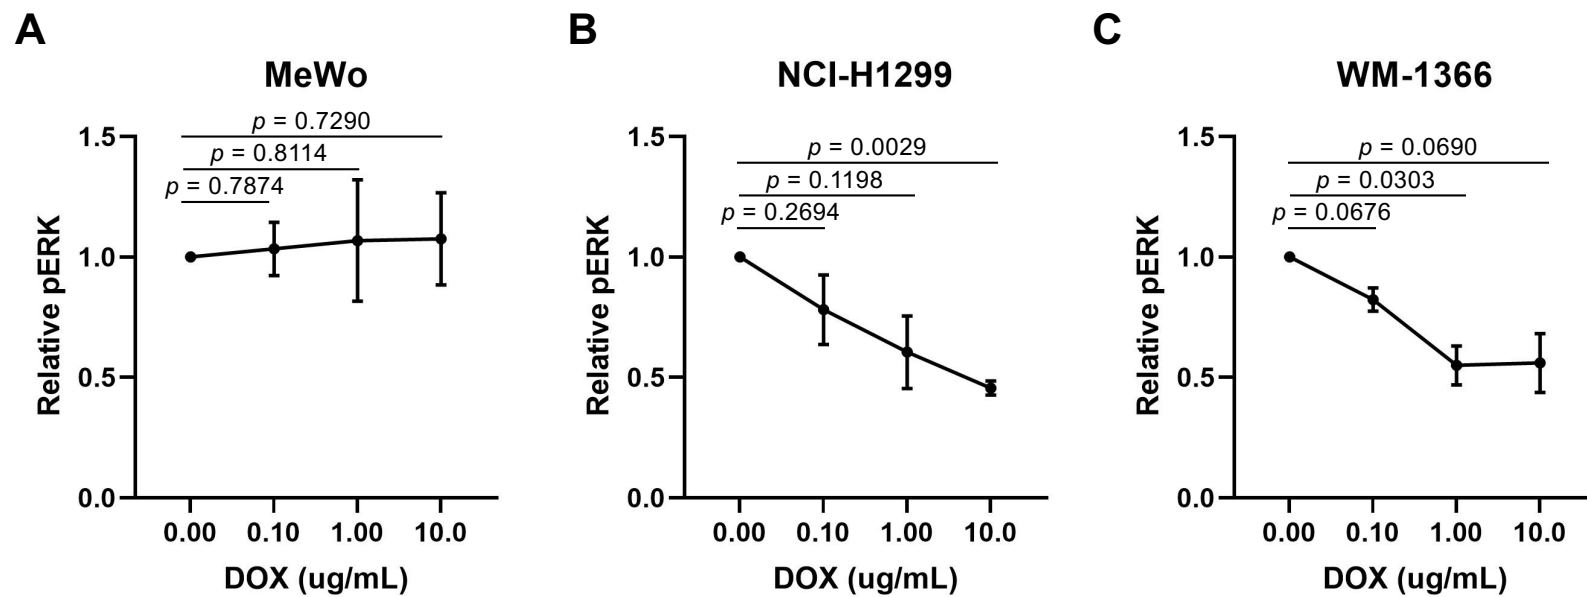

**Supplemental Figure 10.** Quantification of pERK/ERK from Western Blots of A) Fig. 2A, B) Fig. 2B, and C) Fig. 2C. Results repeated three times each (n=3), normalized to 0.00 ug/ul DOX, and compared using paired t test; error bars represent S.E.M.

## Supplemental Figure 11

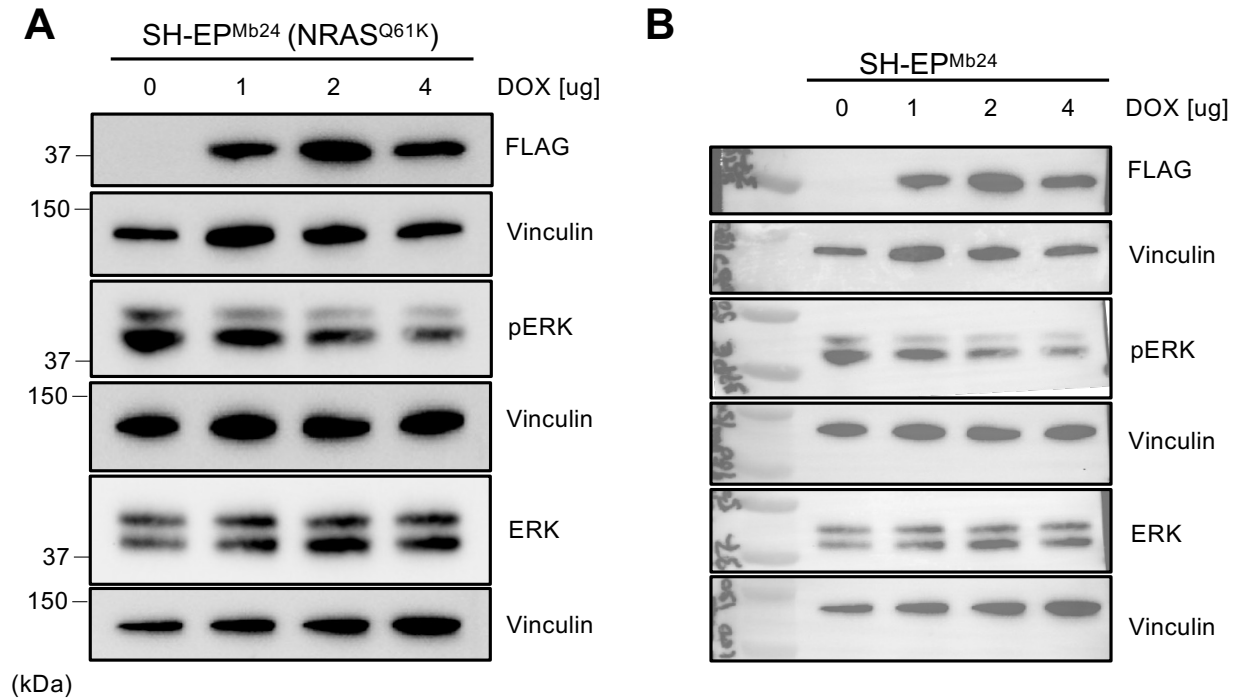

**Supplemental Figure 11.** Chemically-induced expression of CFP-FLAG-tagged Mb24 in an NRAS-mutant, neuroblastoma cell line, SH-EP, inhibits downstream phosphorylation of ERK. A) Western Blot of SH-EP cells after induced CFP-FLAG-tagged Mb24 expression using the indicated DOX concentrations. B) Raw data for Sup. Fig. 11A.

## Supplemental Figure 12

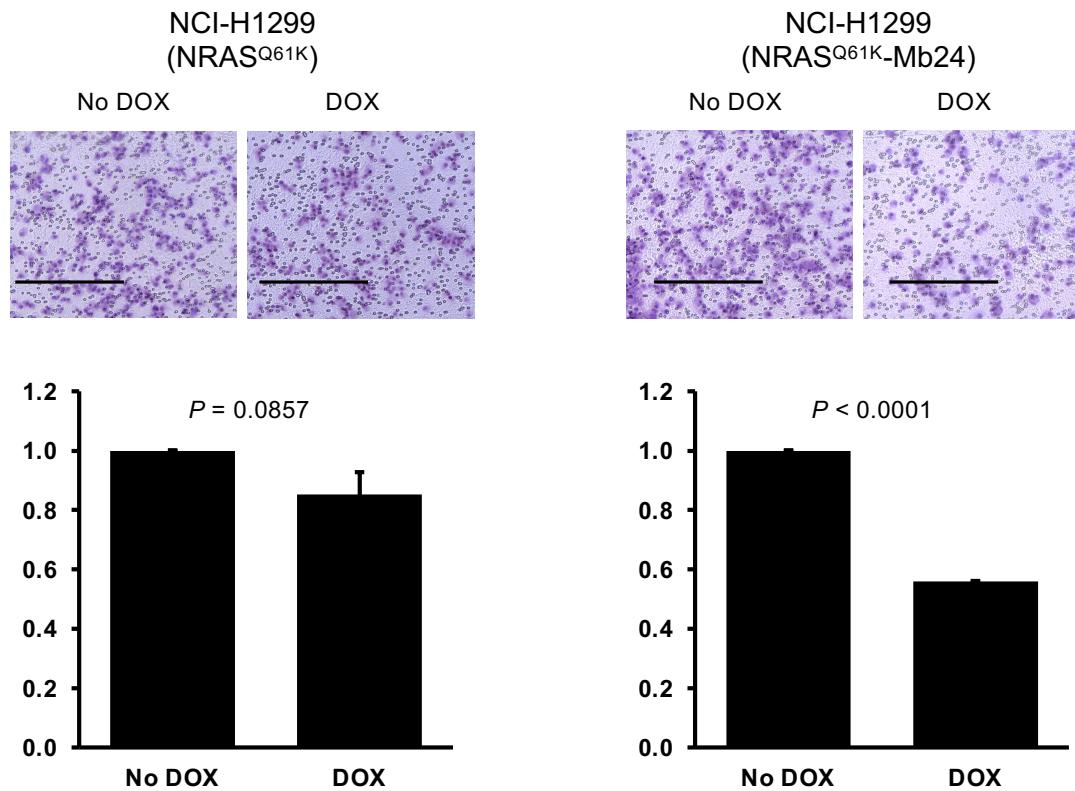

**Supplemental Figure 12.** Migration assays to assess the effect of DOX-induced Mb24 expression on cell migration. Cell counts from -DOX and +DOX were quantified using ImageJ and t-test (Graph Pad) was used to compare differences between samples. Error bars represent S.E.M.

## Supplemental Figure 13

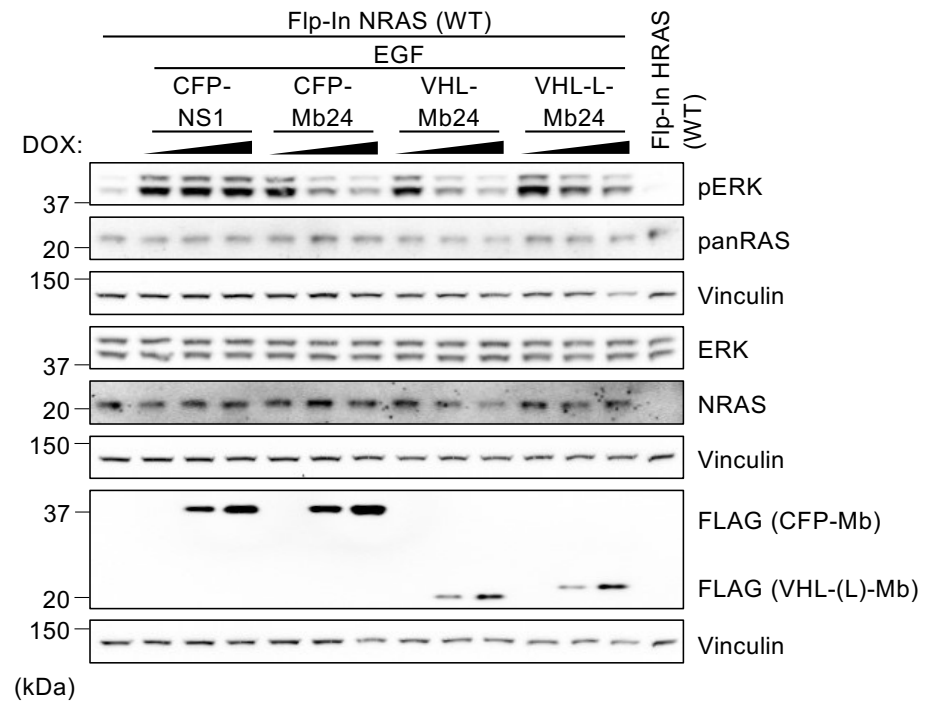

**Supplemental Figure 13.** Chemically induced VHL-tagged Mb24 inhibits and degrades EGF-stimulated NRAS. Raw data for this figure is shown in Supplementary Fig. 7.

## Supplemental Figure 14

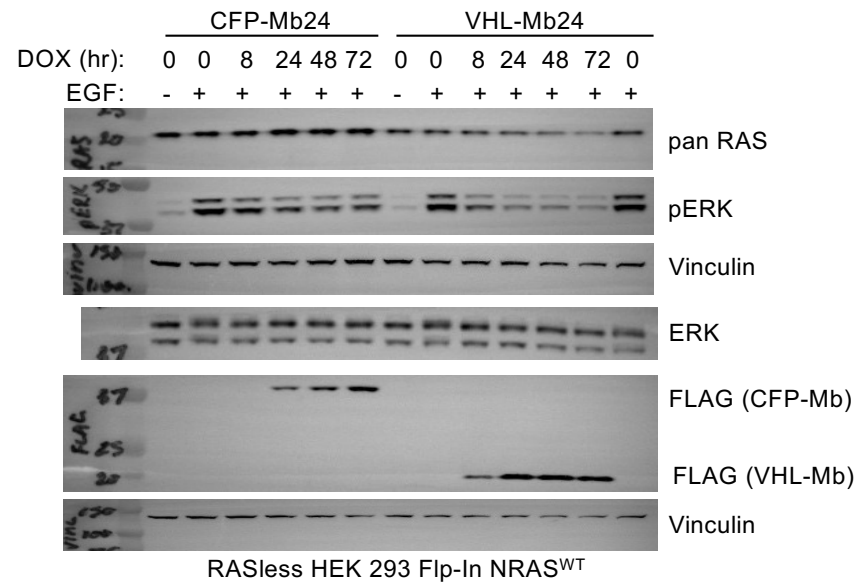

Supplemental Figure 14. Raw data for Western Blot in Fig. 5A.

## Supplemental Figure 15

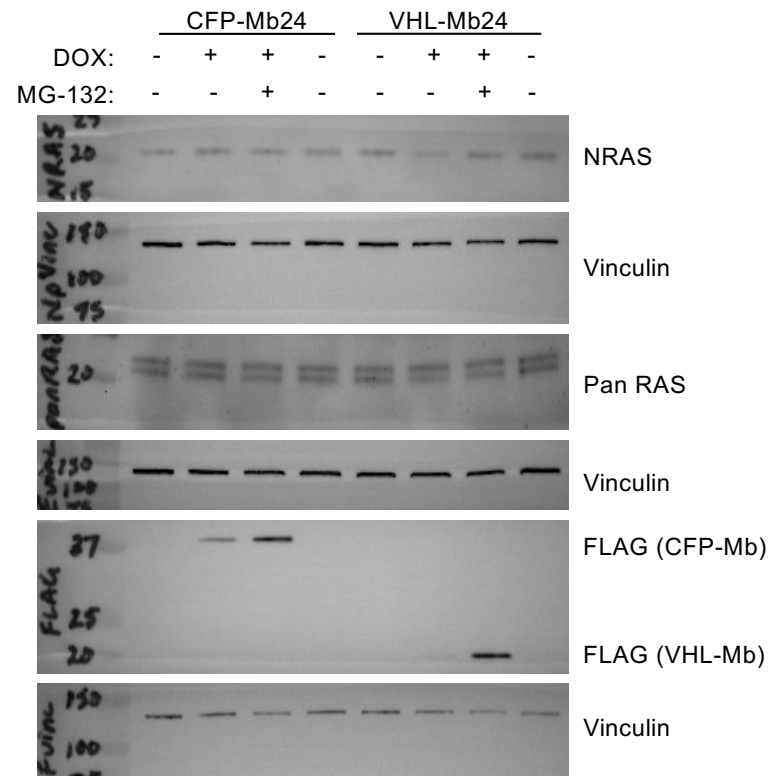

Supplemental Figure 15. Raw data for Western Blot in Fig. 5C.

## Supplemental Figure 16

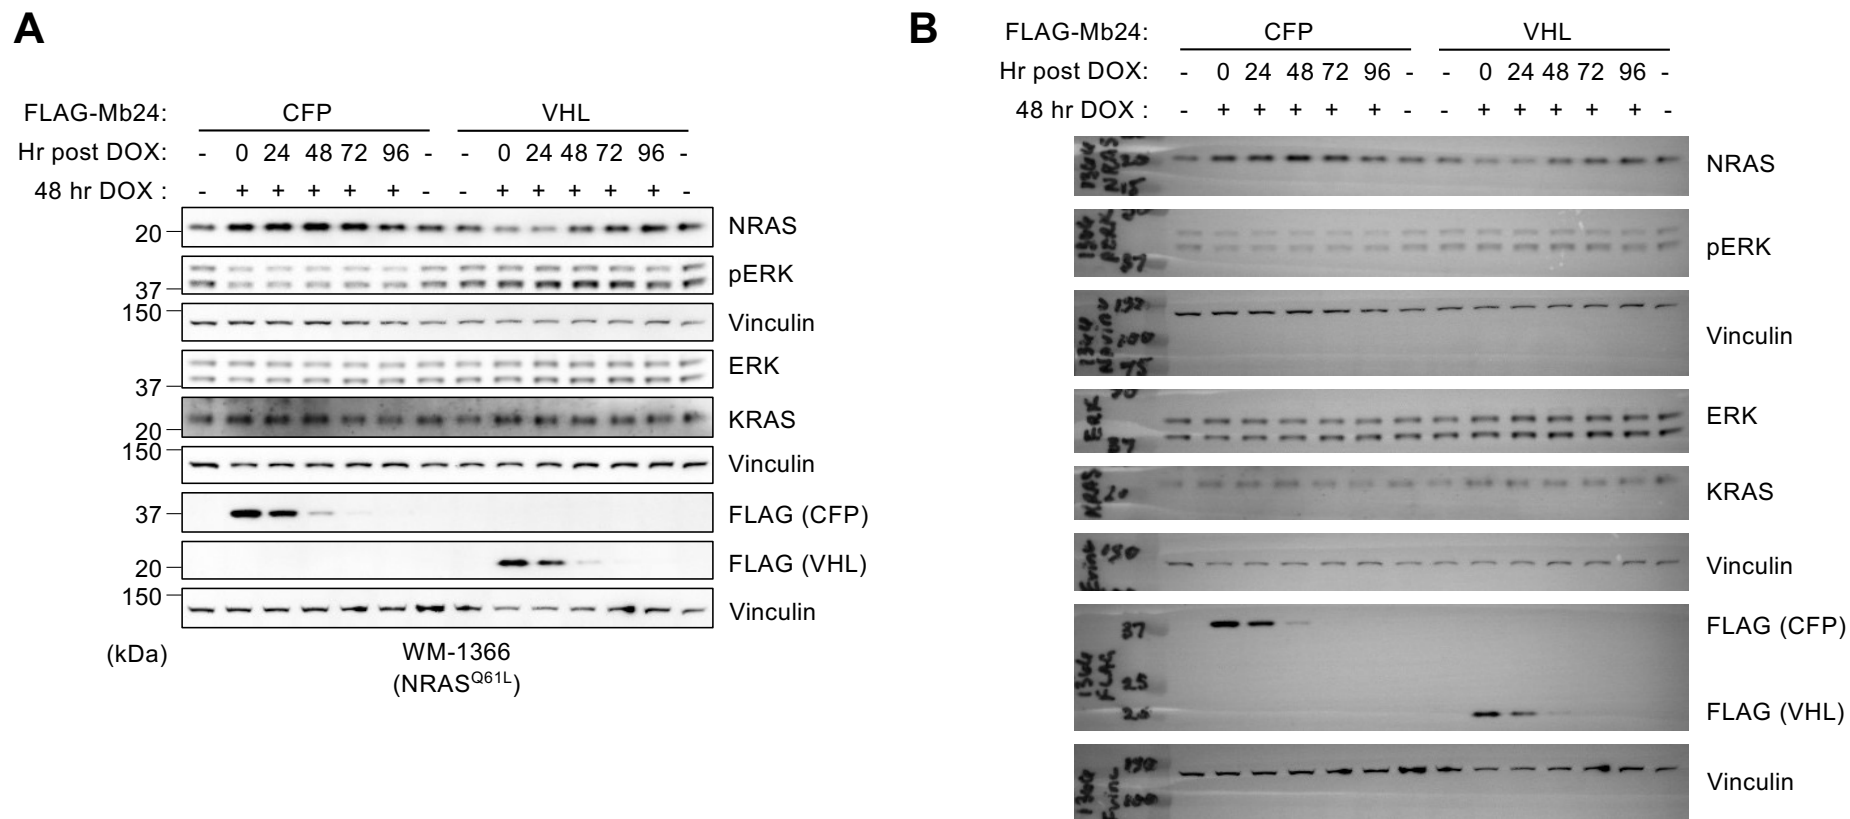

**Supplemental Figure 16.** Effect of NRAS degradation by VHL-Mb24 on NRAS-mediated signaling versus inhibition alone by CFP-Mb24 in WM-1366 cells. A) DOX was added for 48-hours and then removed from the media for indicated time points in WM-1366 cells stably expressing DOX-inducible CFP- or VHL-tagged Mb24. B) Raw data for Western Blot in Sup. Fig. 16A.



## Supplemental Table 1

## RAS Inhibitory Monobodies

| Name              | Platform | Isotype Specificity | Mutation Specificity | Nucleotide Specificity | Affinity (lowest $K_D$ nM) | Epitope                          | PDB ID                     | Reference                                              |
|-------------------|----------|---------------------|----------------------|------------------------|----------------------------|----------------------------------|----------------------------|--------------------------------------------------------|
| NS1               | Monobody | HRAS, KRAS          | none                 | none                   | 14                         | $\alpha4$ - $\beta6$ - $\alpha5$ | 5E 95                      | Spencer-Smith R, et al. (2017) Nat Chem Biol 13:62-68. |
| 12VC1             | Monobody | ND                  | G12C<br>G12V         | GTP                    | 25                         | SI, SII, P-loop                  | 7LOG                       | Teng KW, et al. (2021) Nat Commun 12:2656.             |
| R15               | Monobody | none                | fast cycling         | apo state              | 28                         | ND                               | -                          | Khan I, et al. (2022) Cell Rep 38:110322.              |
| JAM20             | Monobody | none                | none                 | GDP                    | 5                          | SI/SII pocket                    | -                          | Wallon et al (2022) PNAS, e2204481119.                 |
| 12D1, 2, 3, 4 & 5 | Monobody | KRAS                | G12D                 | GTP/GDP                | 9.8                        | SII pocket                       | 8EZG (12D1)<br>8F0M (12D5) | Akkepeddi et al (2023) PNAS, e2302485120.              |
| Mb24              | Monobody | NRAS                | None                 | GDP                    | 0.9                        | ND                               | -                          | This report                                            |

ND, not determined.
